# Supplementary material for: Novel silver–phosphine coordination polymers incorporating a Wurster's blue – like radical cation with enhanced photoelectric properties
Source: Royal Society of Chemistry journal article supplement (doi:10.1039/c9cc01711a), 2019-01-01
Supplement: c9cc01711a1.pdf [file c9cc01711a1.pdf]

Electronic Supplementary Material (ESI) for Chemical Communications.

This journal is © The Royal Society of Chemistry 2019

## **Novel silver-phosphine coordination polymers incorporating Wurster's blue-like radical cations and their photoelectric properties**

Mei Yang,<sup>a</sup> XinYi Wu,<sup>ab</sup> Hui-Fang Wang,<sup>a</sup> David James Young,<sup>c</sup> Zhi-Gang Ren,<sup>\*a</sup> and Jian-Ping Lang<sup>ad</sup>

---

<sup>a</sup>College of Chemistry, Chemical Engineering and Materials Science, Soochow University, Suzhou 215123, Jiangsu, P. R. China. E-mail: [jplang@suda.edu.cn](mailto:jplang@suda.edu.cn), [renzhigang@suda.edu.cn](mailto:renzhigang@suda.edu.cn); Fax: +86-512-65880328.

<sup>b</sup>Applied Technology College of Soochow University, Suzhou 215325, P. R. China.

<sup>c</sup>College of Engineering, Information Technology and Environment, Charles Darwin University, Northern Territory 0909, Australia

<sup>d</sup>State Key Laboratory of Organometallic Chemistry, Shanghai Institute of Organic Chemistry, Chinese Academy of Sciences, Shanghai 200032, P. R. China.

## Table of Contents

|                                                                                                                                                                                                                                                             |     |
|-------------------------------------------------------------------------------------------------------------------------------------------------------------------------------------------------------------------------------------------------------------|-----|
| <b>Experimental Section</b> .....                                                                                                                                                                                                                           | S3  |
| Materials and methods                                                                                                                                                                                                                                       |     |
| Synthesis of compounds <b>1</b> and <b>2</b>                                                                                                                                                                                                                |     |
| Single crystal X-ray crystallography                                                                                                                                                                                                                        |     |
| Electrode Preparation and Photocurrent Measurement                                                                                                                                                                                                          |     |
| Theoretical Calculations                                                                                                                                                                                                                                    |     |
| <b>Table S1</b> Summary of crystal data and structure refinement parameters for samples for <b>1, 2.</b> ..                                                                                                                                                 | S5  |
| <b>Fig. S1</b> UV-Vis absorption spectra of reaction solutions during the syntheses of <b>1</b> and <b>2.</b> .....                                                                                                                                         | S5  |
| <b>Fig. S2</b> PXRD patterns for <b>1</b> and <b>2</b> : simulated from single crystal data (Red) and as-synthesized sample (Black). .....                                                                                                                  | S6  |
| <b>Table S2.</b> The energies (eV) of the frontier molecular orbitals of <b>1, 2</b> form DFT calculations. ..                                                                                                                                              | S7  |
| <b>Fig. S3</b> Molecular orbital distribution of HOMO and LUMO for <b>1, 2.</b> .....                                                                                                                                                                       | S7  |
| <b>Fig. S4</b> Ag 3d XPS spectra of compounds <b>1</b> and <b>2.</b> .....                                                                                                                                                                                  | S7  |
| <b>Fig. S5</b> ESR spectra of compounds <b>1</b> and <b>2</b> recorded in the solid state (a) on cooling from 293 K to 123 K with 20 K temperature intervals, and (b) at 293 K under irradiation by a Xe light (>400 nm) with 4 minute time intervals. .... | S8  |
| <b>Fig. S6</b> ESR spectra of compounds <b>1</b> and <b>2</b> recorded in the CH <sub>2</sub> Cl <sub>2</sub> solutions. ....                                                                                                                               | S8  |
| <b>Fig. S7</b> ESI-MS spectra of compounds <b>1</b> (a) and <b>2</b> (b) using CH <sub>3</sub> OH as mobile phase. ....                                                                                                                                     | S9  |
| <b>Fig. S8</b> Cyclic voltammogram of <b>1</b> and <b>2</b> on ITO glasses (0.4 × 0.5 cm <sup>2</sup> ) with and without Xe light (λ > 400 nm, 150W) irradiation in 0.1 mol/L Na <sub>2</sub> SO <sub>4</sub> aqueous solution. ....                        | S10 |
| <b>References</b> .....                                                                                                                                                                                                                                     | S10 |

## Experimental Section

### Materials and methods

Ligand **dpppda** was prepared according to a literature method<sup>S1</sup>. All other chemicals were obtained from commercial sources and used as received. Elemental analyses (EA) for C, H, and N were determined on a Carlo-Erba CHON-S microanalyzer. IR spectra were obtained using a Nicolet is-10 FT-IR spectrometer (KBr disks, 4000–400 cm<sup>-1</sup>). <sup>1</sup>H and <sup>31</sup>P{<sup>1</sup>H} NMR spectra were recorded at ambient temperature on a Varian UNITY plus-400 spectrometer. Powder X-ray diffraction (PXRD) patterns were collected on a PANalytical Aeris diffractometer (Cu-K $\alpha$ ). X-ray photoelectron spectra (XPS) were collected with an ESCALAB 250Xi Spectrometer. UV-Vis spectra were obtained with a Shimadzu UV-2600 spectrometer. The ESR spectra were obtained with an JES-X320 electron spin resonance spectrometer operating at the X-band (frequency 9.148 GHz) for samples sealed inside a 4 mm thick quartz capillary, with irradiation by a Xe light (500 W, equipped with a filter < 400 nm). Electrospray ion mass spectra (ESI-MS) were recorded on an Agilent 1220/6220 mass spectrometer using methanol as mobile phase.

### Synthesis of compounds 1 and 2

#### Synthesis of [Ag<sub>4</sub>( $\mu_3$ - $\eta^3$ -NO<sub>3</sub>)<sub>4</sub>(**dpppda**)<sub>n</sub>·2CH<sub>2</sub>Cl<sub>2</sub> (**1**·2CH<sub>2</sub>Cl<sub>2</sub>).

To a solution of AgNO<sub>3</sub> (13.6 mg, 0.08 mmol) in 1 mL CH<sub>3</sub>OH was added a solution of **dpppda** (18 mg, 0.02 mmol) in 4 mL CH<sub>2</sub>Cl<sub>2</sub>. The resulting mixture was stirred for 60 min and filtered. Et<sub>2</sub>O (40 mL) was layered onto the filtrate at ambient temperature for 3 days to form blue crystals of **1**·2CH<sub>2</sub>Cl<sub>2</sub>, which were collected by filtration and desolvated *in vacuo*. Yield for **1**: 11 mg (68% based on **dpppda**). Anal. Calcd. For C<sub>58</sub>H<sub>52</sub>Ag<sub>4</sub>N<sub>6</sub>O<sub>12</sub>P<sub>4</sub>: C, 44.02; H, 3.29; N, 5.31, Found: C, 43.75; H, 3.603; N, 5.142 (%). IR (KBr disk): 3040(w), 2924(w), 2415(w), 1755(w), 1615(w), 1606(w), 1500(s), 1375(s), 1080(w), 980(w), 856(w), 735(m), 690(m) cm<sup>-1</sup>.

#### Synthesis of [Ag<sub>4</sub>( $\mu$ - $\eta^2$ -NO<sub>3</sub>)<sub>2</sub>( $\mu$ - $\eta$ , $\eta^2$ -NO<sub>3</sub>)<sub>2</sub>(**dpppda**)<sub>n</sub> (**2**).

To a solution of AgNO<sub>3</sub> (13.6 mg, 0.08 mmol) in 1 mL CH<sub>3</sub>OH was added a solution of **dpppda** (18 mg 0.02 mmol) in 2 mL CHCl<sub>3</sub>. The resulting mixture was stirred for 300 min and filtered. Et<sub>2</sub>O (40 mL) was layered onto the filtrate at ambient temperature for 2 days to form dark-green crystals of **2**, which were collected by filtration, washed with Et<sub>2</sub>O and dried *in vacuo*. Yield for **2**: 12 mg (38% based on **dpppda**). Anal. Calcd for C<sub>58</sub>H<sub>52</sub>Ag<sub>4</sub>N<sub>6</sub>O<sub>12</sub>P<sub>4</sub>: C, 44.02; H, 3.29; N, 5.31. Found: C, 43.53; H, 3.402; N, 5.095(%). IR (KBr disk) 3050(w), 2910(w), 2420(w), 1615(w), 1505(m), 1450(m), 1370(s), 1260(m), 1130(w), 990(w), 720(m), 680(m) cm<sup>-1</sup>.

### Single crystal X-ray crystallography

Single crystals of **1**·2CH<sub>2</sub>Cl<sub>2</sub> and **2** suitable for single crystal X-ray crystallography were obtained directly from the above preparations. Each crystal was mounted on a glass fiber with grease and cooled in a liquid nitrogen stream to 223K. Crystallographic measurements were carried out on an Agilent Xcalibur (**1**·2CH<sub>2</sub>Cl<sub>2</sub>) and a Rigaku Mercury (**2**) CCD X-ray diffractometer using graphite monochromated Cu K $\alpha$  ( $\lambda$  = 1.54178 Å, for **1**·2CH<sub>2</sub>Cl<sub>2</sub>) and Mo K $\alpha$  ( $\lambda$  = 0.71073 Å, for **2**) and radiations. The programs CrysAlisPro (Agilent Technologies, Ver. 1.171.36.28, for **1**·2CH<sub>2</sub>Cl<sub>2</sub>) and Crystalclear (Rigaku and MSc, Ver. 1.3, for **2**) were used for the refinement of cell parameters and the reduction of collected data, while absorption corrections (multi-scan) were applied.

The crystal structures were solved by direct methods and refined on  $F^2$  by full-matrix least squares methods with the SHELXTL-2016 program package. The solvated  $\text{CH}_2\text{Cl}_2$  molecule in  $1 \cdot 2\text{CH}_2\text{Cl}_2$  was disordered over two positions with equal occupancies. All non-hydrogen atoms were refined anisotropically. All hydrogen atoms were added theoretically. Relevant crystal data, collection parameters, and refinement results can be found in Table S1.

#### **Electrode Preparation and Photocurrent Measurement.**

Photoelectrodes were prepared using the powder-coating method<sup>S2</sup>. Compounds **1** and **2** were ground and pressed uniformly on a cleaned indium tin oxide (ITO) glass ( $10 \text{ } \Omega/\text{square}$ ) with an effective area of  $0.2 \text{ cm}^2$  ( $0.4 \text{ cm} \times 0.5 \text{ cm}$ ). A 150 W Xenon lamp equipped with a UV filter ( $< 400\text{nm}$ ) was located 20 cm away from the surface of the ITO electrode and employed as the light source. The cyclic voltammetry and photocurrent experiments were performed on a CHI-630E electrochemistry workstation in a three-electrode system, with the sample-coated ITO glass as the working electrode, a Pt plate as the auxiliary electrode, and a saturated calomel electrode (SCE) as the reference electrode. The supporting electrolyte solution was a 0.1 mol/L  $\text{Na}_2\text{SO}_4$  aqueous solution. During the photocurrent experiment, the lamp was kept on continuously, and a manual shutter was used to block the exposure of the sample to the light in 20s time intervals.

#### **Density functional theory (DFT) calculations for HOMO–LUMO analysis.**

The HOMO and LUMO energies of **1** and **2** were calculated with the Gaussian 09 program using the Cartesian coordinates at their solid-state structures<sup>S3</sup>. The LanL2DZ relativistic effective core potential was used for the Ag atom and the 6-31G(d,p) basis set was used for the other atoms (P, C, N, O and H)<sup>S4</sup>. Calculations with the B3LYP functional were estimated<sup>S5</sup>. Test calculations with Stuttgart-Dresden (SDD) ECPs basis set for Ag atoms in M06 calculations give a similar result to that obtained by the LanL2DZ basis set.

**Table S1.** Summary of crystal data and structure refinement parameters for **1**·2CH<sub>2</sub>Cl<sub>2</sub> and **2**.

| Compound                                   | <b>1</b> ·2CH <sub>2</sub> Cl <sub>2</sub>                                                                                       | <b>2</b>                                                                                      |
|--------------------------------------------|----------------------------------------------------------------------------------------------------------------------------------|-----------------------------------------------------------------------------------------------|
| empirical formula weight                   | C <sub>58</sub> H <sub>52</sub> Ag <sub>4</sub> N <sub>6</sub> O <sub>12</sub> P <sub>4</sub> , 2CH <sub>2</sub> Cl <sub>2</sub> | C <sub>58</sub> H <sub>52</sub> Ag <sub>4</sub> N <sub>6</sub> O <sub>12</sub> P <sub>4</sub> |
| crystal system                             | monoclinic                                                                                                                       | Monoclinic                                                                                    |
| space group                                | <i>C2/c</i>                                                                                                                      | <i>P2<sub>1</sub>/c</i>                                                                       |
| <i>a</i> (Å)                               | 28.2415(8)                                                                                                                       | 11.096(2)                                                                                     |
| <i>b</i> (Å)                               | 13.1850(3)                                                                                                                       | 23.934(5)                                                                                     |
| <i>c</i> (Å)                               | 19.6699(5)                                                                                                                       | 11.876(2)                                                                                     |
| $\beta$ (°)                                | 114.578(3)                                                                                                                       | 108.96(3)                                                                                     |
| <i>V</i> (Å <sup>3</sup> )                 | 6660.7(3)                                                                                                                        | 2982.8(12)                                                                                    |
| $\rho_{\text{calc}}$ (g cm <sup>-3</sup> ) | 1.745                                                                                                                            | 1.760                                                                                         |
| <i>Z</i>                                   | 4                                                                                                                                | 2                                                                                             |
| $\mu$ (mm <sup>-1</sup> )                  | 12.215                                                                                                                           | 1.468                                                                                         |
| <i>F</i> (000)                             | 3480.0                                                                                                                           | 1572.0                                                                                        |
| <i>R</i> <sub>1</sub> <sup>a</sup>         | 0.0800                                                                                                                           | 0.0570                                                                                        |
| <i>wR</i> <sub>2</sub> <sup>b</sup>        | 0.2333                                                                                                                           | 0.0989                                                                                        |
| <i>GOF</i> <sup>c</sup>                    | 1.042                                                                                                                            | 1.092                                                                                         |

<sup>a</sup> $R_1 = \frac{\sum ||F_o| - |F_c||}{\sum |F_o|}$ . <sup>b</sup> $wR_2 = \frac{\{\sum w(F_o^2 - F_c^2)^2\}}{\{\sum w(F_o^2)^2\}}^{1/2}$ . <sup>c</sup> $GOF = \frac{\{\sum w((F_o^2 - F_c^2)^2)/(n-p)\}}{1/2}$ , where *n* = number of reflection and *p* = total number of parameters refined.

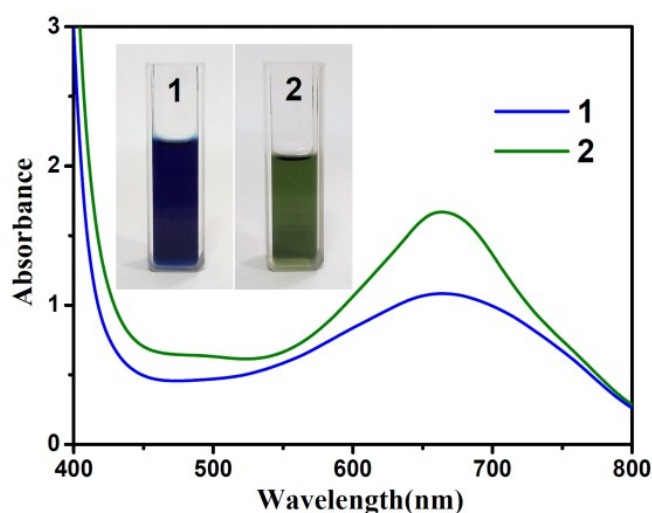**Fig. S1** UV-Vis spectra of reaction solutions during the syntheses of **1** and **2**. The solutions were prepared by stirring the mixture of AgNO<sub>3</sub> (13.6 mg) and dppda (18 mg) in 1 mL CH<sub>3</sub>OH and 4 mL CH<sub>2</sub>Cl<sub>2</sub> (60minutes, for **1**) or in 1 mL CH<sub>3</sub>OH and 2 mL CHCl<sub>3</sub> (300minutes, for **2**), and then filtered.

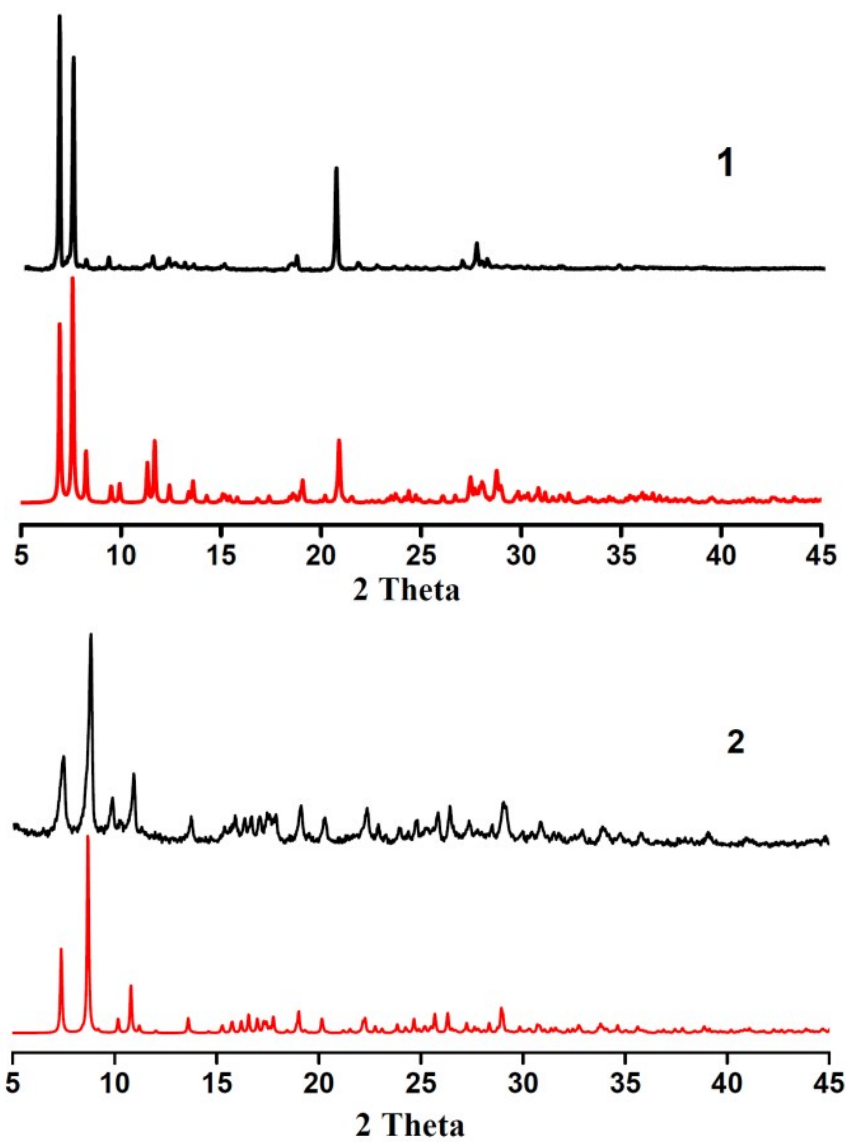

**Fig. S2** PXRD patterns for **1** and **2**: simulated from single crystal data (Red) and as-synthesized sample (Black).

**Table S2** The energies (eV) of the frontier molecular orbitals of **1**, **2** from DFT calculations.

|          | HOMO-1 | HOMO  | LUMO  | LUMO+1 | $\Delta E_{LUMO-HOMO}$ | $\lambda$ |
|----------|--------|-------|-------|--------|------------------------|-----------|
|          | eV     | eV    | eV    | eV     | eV                     | nm        |
| <b>1</b> | -5.57  | -4.19 | -3.27 | -2.31  | 0.92                   | 1348      |
| <b>2</b> | -5.50  | -4.28 | -3.22 | -2.42  | 1.06                   | 1170      |

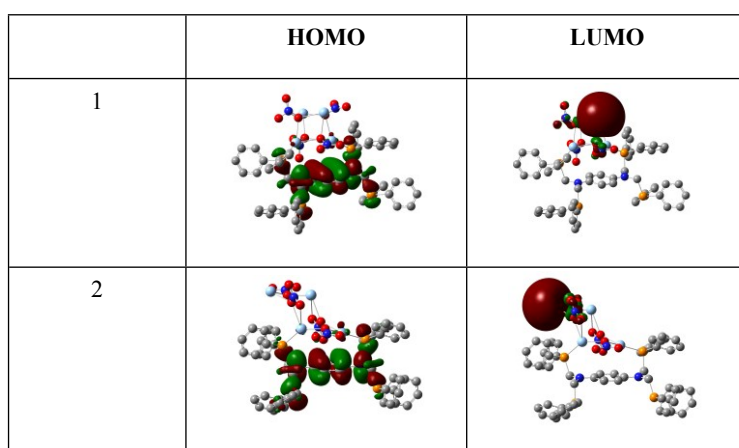

**Fig. S3** Molecular orbital distribution of HOMO and LUMO for **1**, **2**.

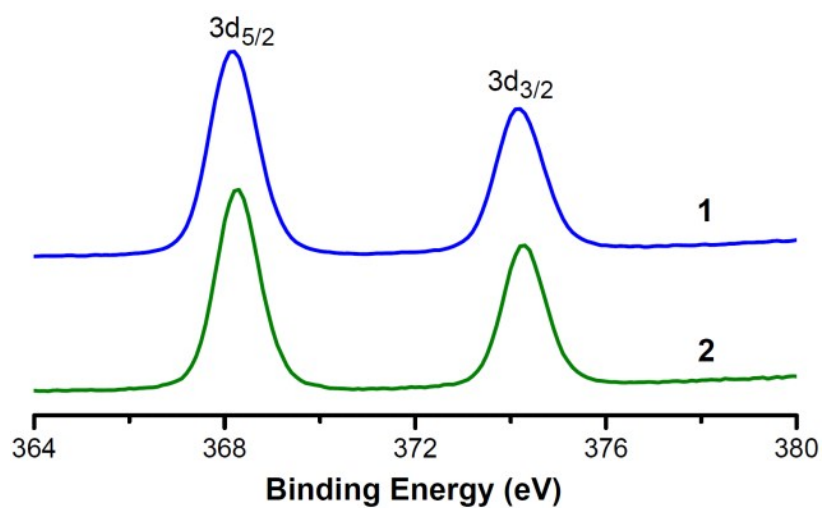

**Fig. S4** Ag 3d XPS spectra of compounds **1** and **2**.

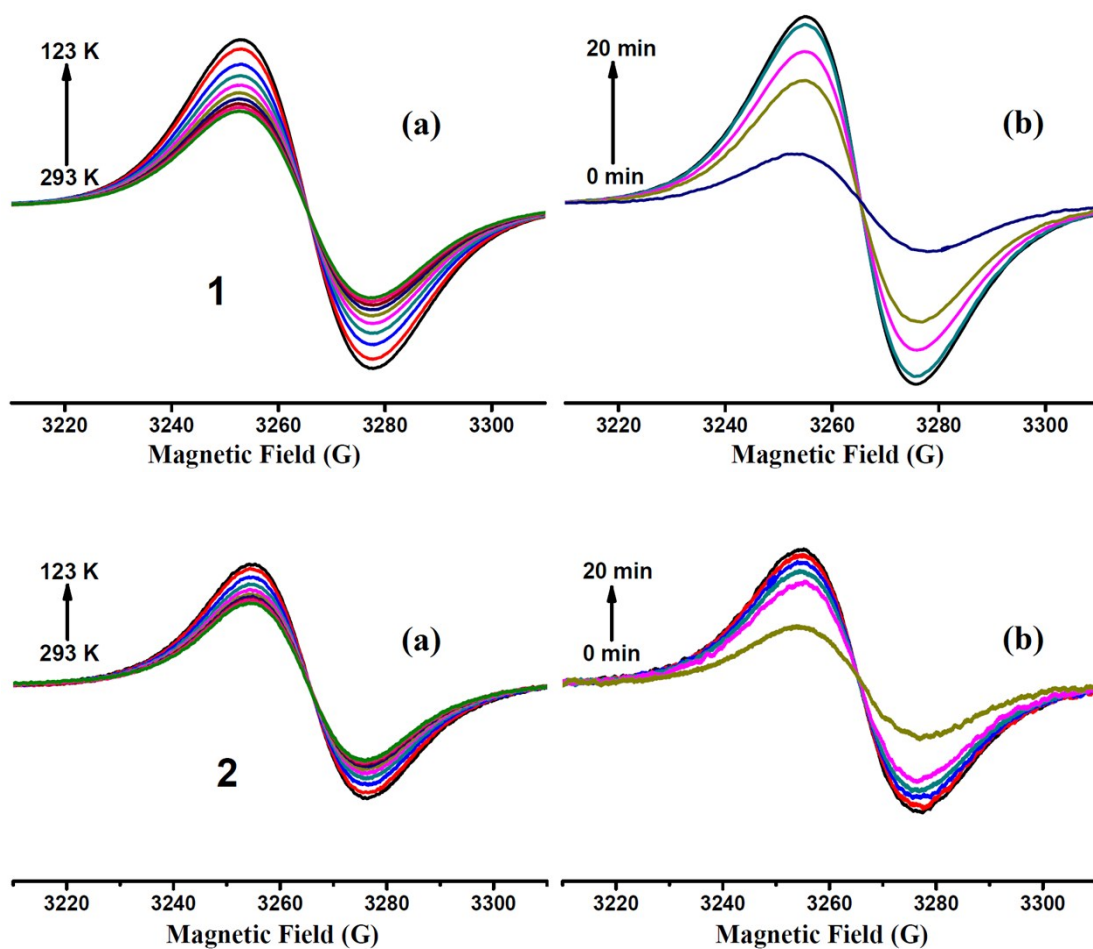

**Fig. S5** ESR spectra of compounds **1** (upper) and **2** (lower) recorded in the solid state (a) on cooling from 293 K to 123 K with 20 K temperature intervals, and (b) at 293 K under irradiation by Xe a light (>400 nm) with 4 minute time intervals. Microwave Freq = 9.1516 GHz, Field Center = 326.000 mT, Width = 0.4000 mT, Sweep Time = 30.0 s.

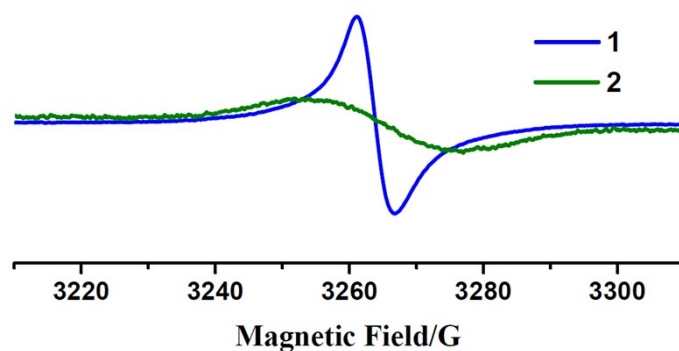

**Fig. S6** ESR spectra of compounds **1** and **2** recorded in the  $\text{CH}_2\text{Cl}_2$  solutions. Microwave Freq = 9.1486 GHz, Field Center = 326.000 mT, Width = 0.4000 mT, Sweep Time = 30.0 s.



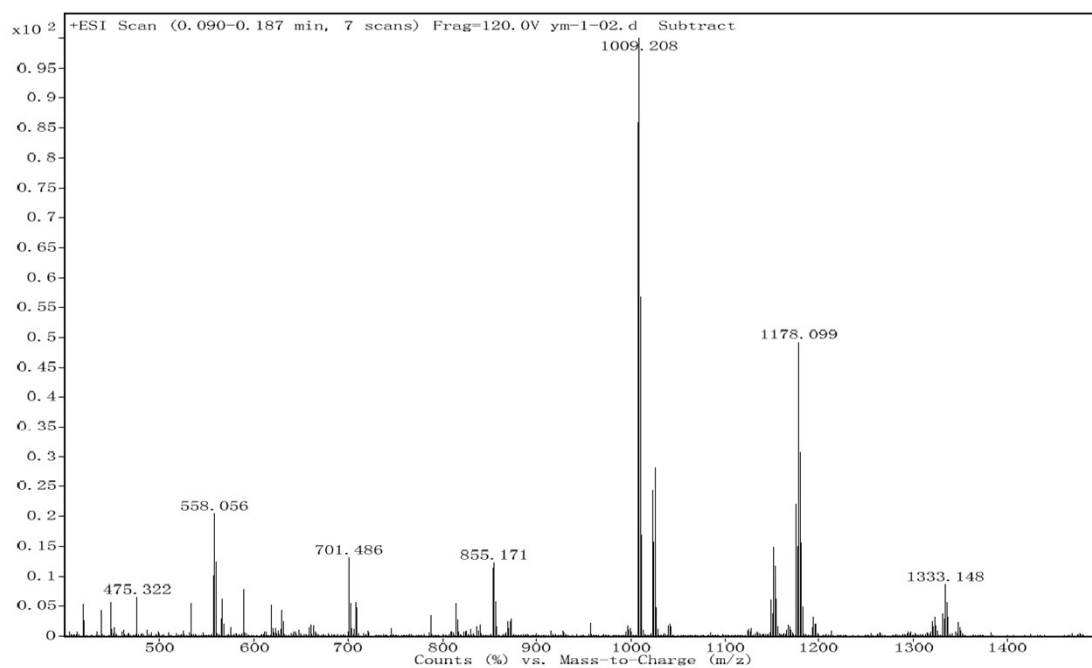

(a)

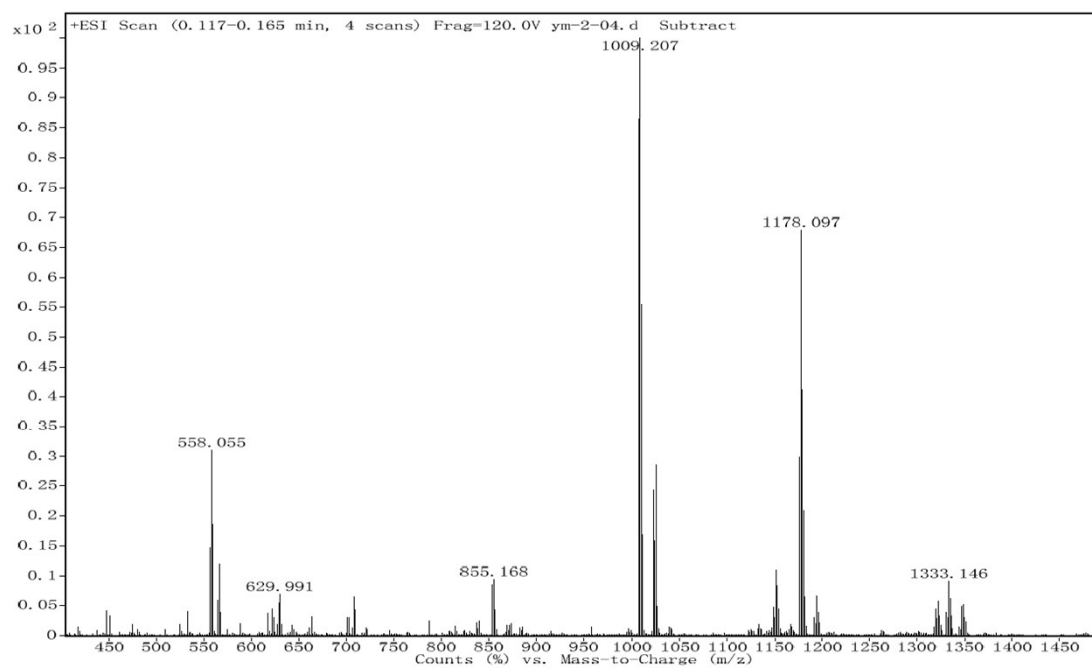

(b)

**Fig. S7** ESI-MS spectra of compounds **1** (a) and **2** (b) using CH<sub>3</sub>OH as mobile phase.

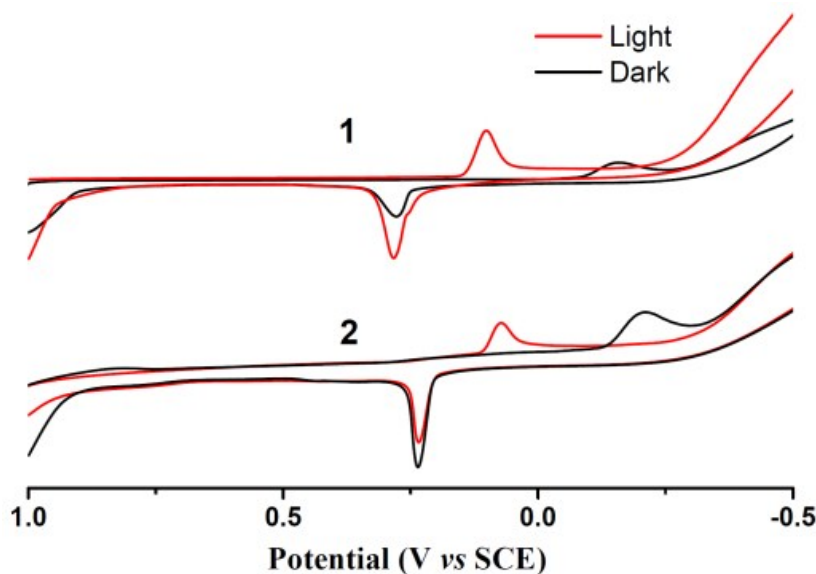

**Fig. S8** Cyclic voltammogram of **1** and **2** on ITO glasses ( $0.4 \times 0.5 \text{ cm}^2$ ) with and without Xe light ( $\lambda > 400 \text{ nm}$ , 150W) irradiation in 0.1 mol/L  $\text{Na}_2\text{SO}_4$  aqueous solution.

## References

- S1. S. Uruş, M. İncesua, S. Köşker, A. H. Kurtc and G. Ceyhanb, *Appl. Organometal. Chem.* 2017, **31**, e3550, 1-10.
- S2. J. F. Wang, S. Y. Liu, C. Y. Liu, Z. G. Ren, J. P. Lang, *Dalton Trans.*, 2016, **45**, 9294–9306.
- S3. M. J. Frisch, G. W. Trucks, H. B. Schlegel, G. E. Scuseria, M. A. Robb, J. R. Cheeseman, G. Scalmani, V. Barone, B. Mennucci, G. A. Petersson, H. Nakatsuji, M. Caricato, X. Li, H. P. Hratchian, A. F. Izmaylov, J. Bloino, G. Zheng, J. L. Sonnenberg, M. Hada, M. Ehara, K. Toyota, R. Fukuda, J. Hasegawa, M. Ishida, T. Nakajima, Y. Honda, O. Kitao, H. Nakai, T. Vreven, J. A. Montgomery, J. E. Peralta Jr., F. Ogliaro, M. Bearpark, J. J. Heyd, E. Brothers, K. N. Kudin, V. N. Staroverov, R. Kobayashi, J. Normand, K. Raghavachari, A. Rendell, J. C. Burant, S. S. Iyengar, J. Tomasi, M. Cossi, N. Rega, J. M. Millam, M. Klene, J. E. Knox, J. B. Cross, V. Bakken, C. Adamo, J. Jaramillo, R. Gomperts, R. E. Stratmann, O. Yazyev, A. J. Austin, R. Cammi, C. Pomelli, J. W. Ochterski, R. L. Martin, K. Morokuma, V. G. Zakrzewski, G. A. Voth, P. Salvador, J. J. Dannenberg, S. Dapprich, A. D. Daniels, Ö. Farkas, J. B. Foresman, J. V. Ortiz, J. Cioslowski and D. J. Fox, Gaussian-09, Revision A.1; Gaussian, Inc.: Wallingford, CT, 2009.

- S4. (a) L. Y. Li, M. Y. Xu, X. Chen, Q. J. Zhang and K. Z. Wang, *Solar Energy*, 2011, **85**, 1780-1786; (b) A. Badura, D. Guschin, T. Kothe, M. J. Kopczak, W. Schuhmann and M. Rögner, *Energy Environ. Sci.*, 2011, **4**, 2435-2440.
- S5. (a) A. D. Becke, *J. Chem. Phys.*, 1993, **98**, 5648-5652; (b) C. Lee, W. Yang and R. Parr, *Phys. Rev. B.*, 1988, **37**, 785-789.
